# Supplementary material
Source: PubMed Central journal article supplement (PMC10067818)
Supplement: 41394_2023_569_MOESM1_ESM.pdf [file 41394_2023_569_MOESM1_ESM.pdf]

**Appendix 2.** Alex R. Vaccaro Conflict of Interest: Health Care Entity Relationships and Investments

| <i>Entity</i>                            | <i>Relationship (See Legend Below)</i> | <i>Value</i> |
|------------------------------------------|----------------------------------------|--------------|
| Replication Medica                       | d                                      |              |
| Medtronics                               | c                                      |              |
| Stryker Spine                            | c                                      |              |
| Globus                                   | c, d                                   |              |
| Paradigm Spine                           | d                                      |              |
| Stout Medical                            | d                                      |              |
| Progressive Spinal Technologies          | d                                      |              |
| Advanced Spinal Intellectual Properties  | d                                      |              |
| Aesculap                                 | c                                      |              |
| Spine Medica                             | d                                      |              |
| Computational Biodynamics                | d                                      |              |
| Spinology                                | d                                      |              |
| Flagship Surgical                        | d                                      |              |
| Cytonics                                 | d                                      |              |
| Bonovo Orthopaedics                      | d                                      |              |
| Electrocore                              | d                                      |              |
| Insight Therapeutics                     | d                                      |              |
| FlowPharma                               | d                                      |              |
| Rothman Institute and Related Properties | d                                      |              |
| AO Spine                                 | g                                      |              |
| Innovative Surgical Design               | d                                      |              |
| Orthobullets                             | d                                      |              |
| Thieme                                   | c                                      |              |
| Jaypee                                   | c                                      |              |
| Elseviere                                | c                                      |              |
| Taylor Francis/Hodder and Stoughton      | c                                      |              |
| Expert testimony                         | g                                      |              |
| Vertiflex                                | d                                      |              |
| Avaz Surgical                            | d                                      |              |
| Dimension Orthotics, LLC                 | d                                      |              |
| SpineWave                                | c                                      |              |
| Atlas Spine                              | c                                      |              |
| Nuvasive                                 | d                                      |              |
| Parvizi Surgical Innovation              | d                                      |              |
| Franklin Bioscience                      | d                                      |              |
| Deep Health                              | d                                      |              |

a. Consulting / Independent Contractor; b. Service on Scientific Advisory Board / Board of Directors / Service on Committees; c. Receipt of Royalty Payments; d. Stock / Stock Option Ownership Interests; e. Institutional / Educational Grant; f. Deputy editor/ Editor/Editorial Board; g. Member in good standing / Independent Contractor
